# Supplementary material
Source: MDPI journal article supplement (https://www.mdpi.com/2073-8994/12/5/735)
Supplement: s1 [file s1]

**Table S1.** Volume and asymmetry quotient of cerebellar cortex in male and female ferrets.

|                        | Volume (mm <sup>3</sup> ) |              | AQ Values      |
|------------------------|---------------------------|--------------|----------------|
|                        | Left Side                 | Right Side   |                |
| Whole cerebellum       |                           |              |                |
| Male (n = 7)           | 370.2 ± 27.7              | 359.9 ± 31.8 | −0.029 ± 0.044 |
| Female (n = 7)         | 311.7 ± 21.9              | 310.8 ± 12.6 | −0.001 ± 0.060 |
| Anterior zone          |                           |              |                |
| Male (n = 7)           | 101.4 ± 9.3               | 106.9 ± 8.3  | 0.054 ± 0.077  |
| Female (n = 7)         | 80.6 ± 8.0                | 82.6 ± 4.2   | 0.054 ± 0.090  |
| Central zone anterior  |                           |              |                |
| Male (n = 7)           | 42.5 ± 10.0               | 38.7 ± 8.5   | −0.094 ± 0.067 |
| Female (n = 7)         | 39.5 ± 6.8                | 38.1 ± 7.3   | 0.040 ± 0.146  |
| Central zone posterior |                           |              |                |
| Male (n = 7)           | 82.4 ± 9.8                | 75.6 ± 11.4  | −0.090 ± 0.097 |
| Female (n = 7)         | 69.4 ± 12.9               | 67.4 ± 9.6   | −0.022 ± 0.075 |
| Posterior zone         |                           |              |                |
| Male (n = 7)           | 57.8 ± 5.5                | 54.2 ± 7.8   | −0.072 ± 0.101 |
| Female (n = 7)         | 48.0 ± 5.3                | 46.9 ± 3.1   | −0.020 ± 0.075 |

Data are represented as mean ± SD.
